# Supplementary material for: Single-cell reference mapping to construct and extend cell-type hierarchies
Source: PubMed Central journal article supplement (PMC10370450; doi:10.1093/nargab/lqad070), 2023-07-26
Supplement: lqad070_supplemental_file.pdf [file lqad070_supplemental_file.pdf]

## Supplementary Material

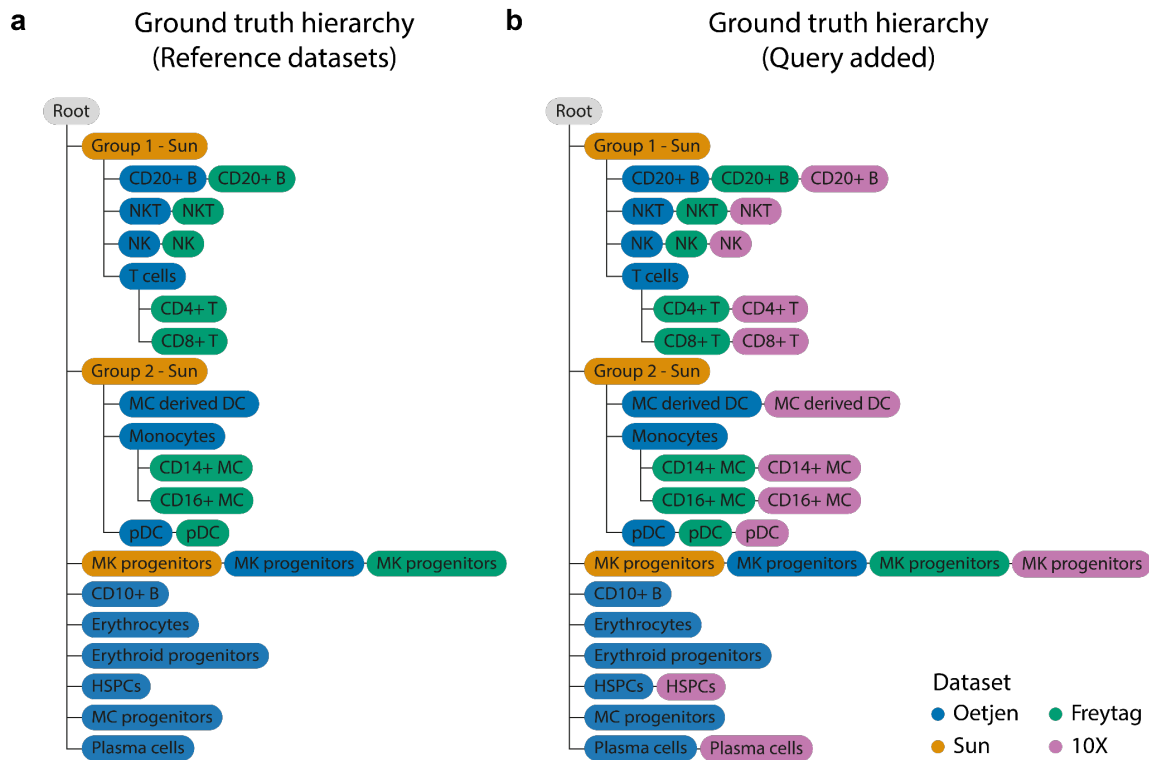

**Figure S1:** Ground truth hierarchy for a) the reference datasets (Sun, Oetjen, and Freytag) and b) when adding the query dataset (10X).

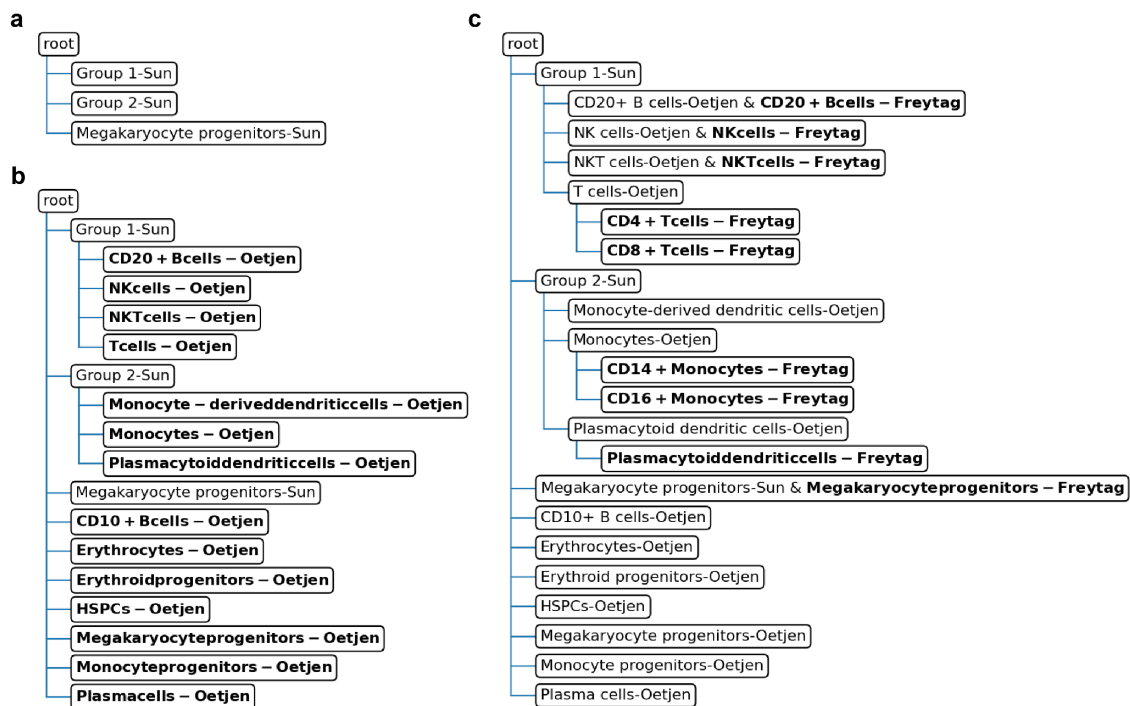

**Figure S2:** Intermediate step when creating the cell-type hierarchy for the reference PBMC datasets. a) Starting tree, which is a flat tree containing only the cell types of the Freytag dataset, b) Oetjen dataset added, c) Sun dataset added

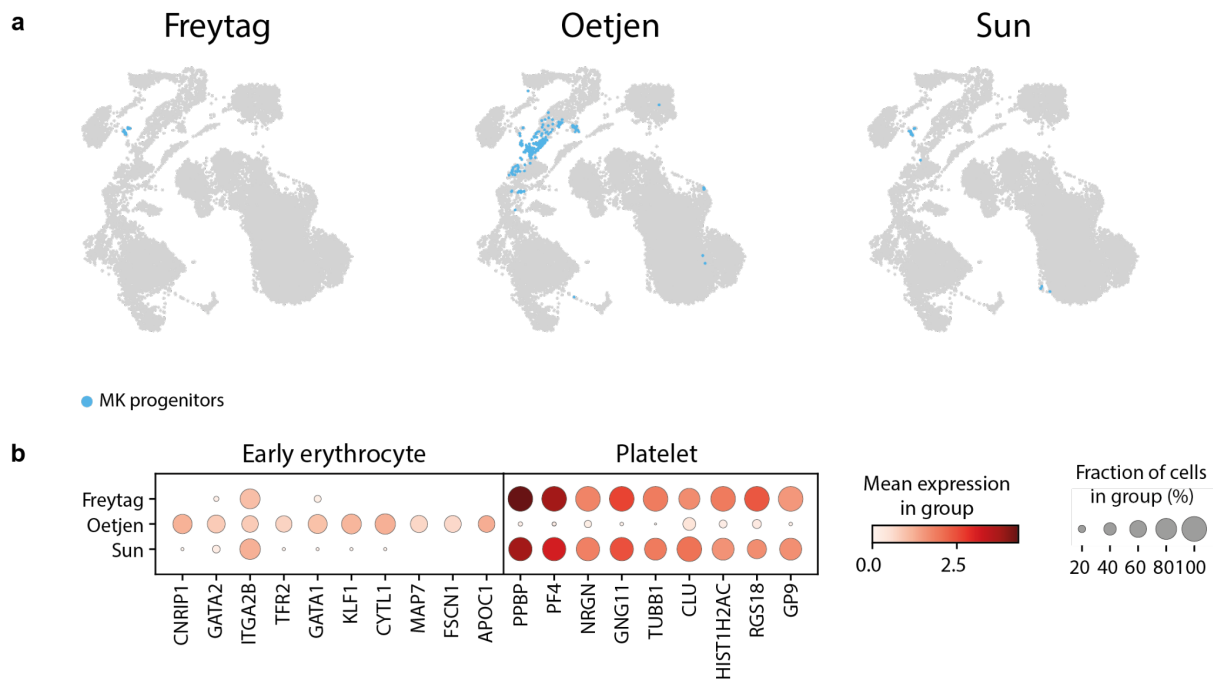

**Figure S3:** a) UMAP embedding showing the different cell types in the Freytag, Oetjen, and Sun dataset. Megakaryocyte (MK) progenitor cells of the Freytag and Sun dataset are at a different location than the Oetjen dataset. b) Marker gene expression for early erythrocytes and platelets in the three datasets.

Default  
(FN = 0.5, dist = 0.99, post. prob. = 0.5)

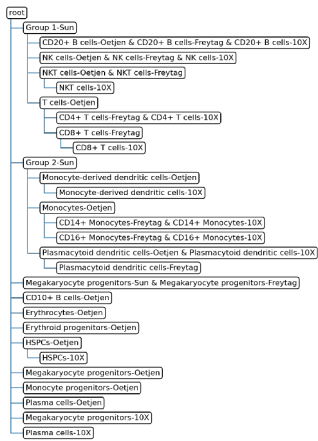

FN = 0.25

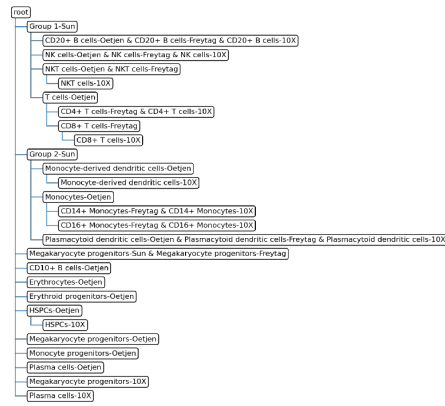

FN = 1

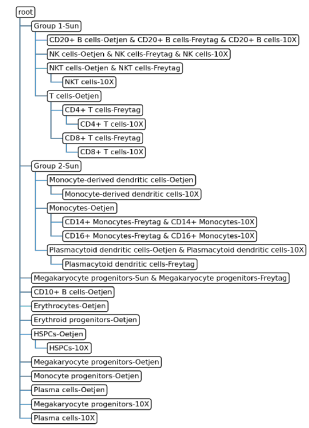

Dist = 0.95

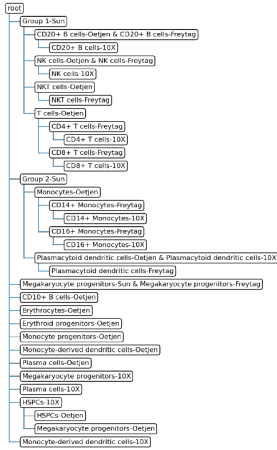

Dist = 0.995

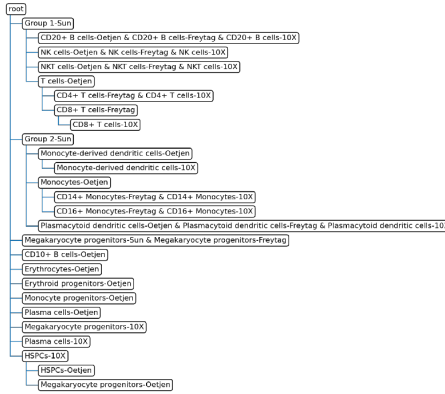

Post. prob. = 0.25

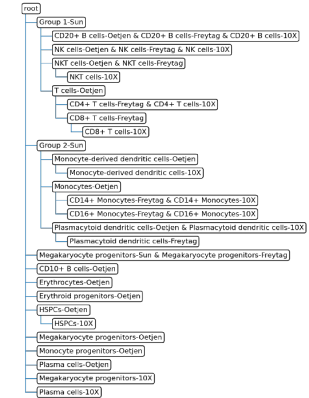

Missing cell types:  
NKT cells-10X

Post. prob. = 0.75

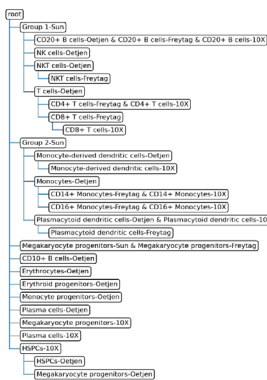

Missing cell types:  
NKT cells-10X

No rejection options

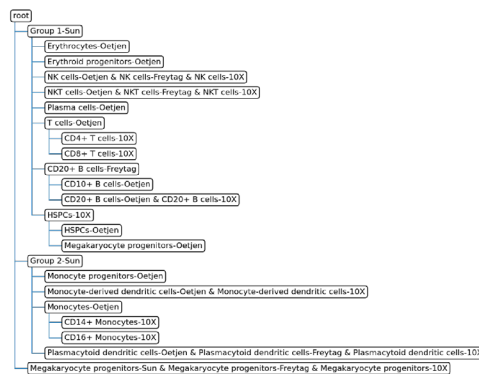

Missing cell types:  
CD14+ Monocytes-Freytag  
CD16+ Monocytes-Freytag  
CD4+ T cells-Freytag  
CD8+ T cells-Freytag  
Plasma cells-10X

**Figure S4:** Constructed cell-type hierarchies for the PBMC datasets using different parameters for the three rejection options.

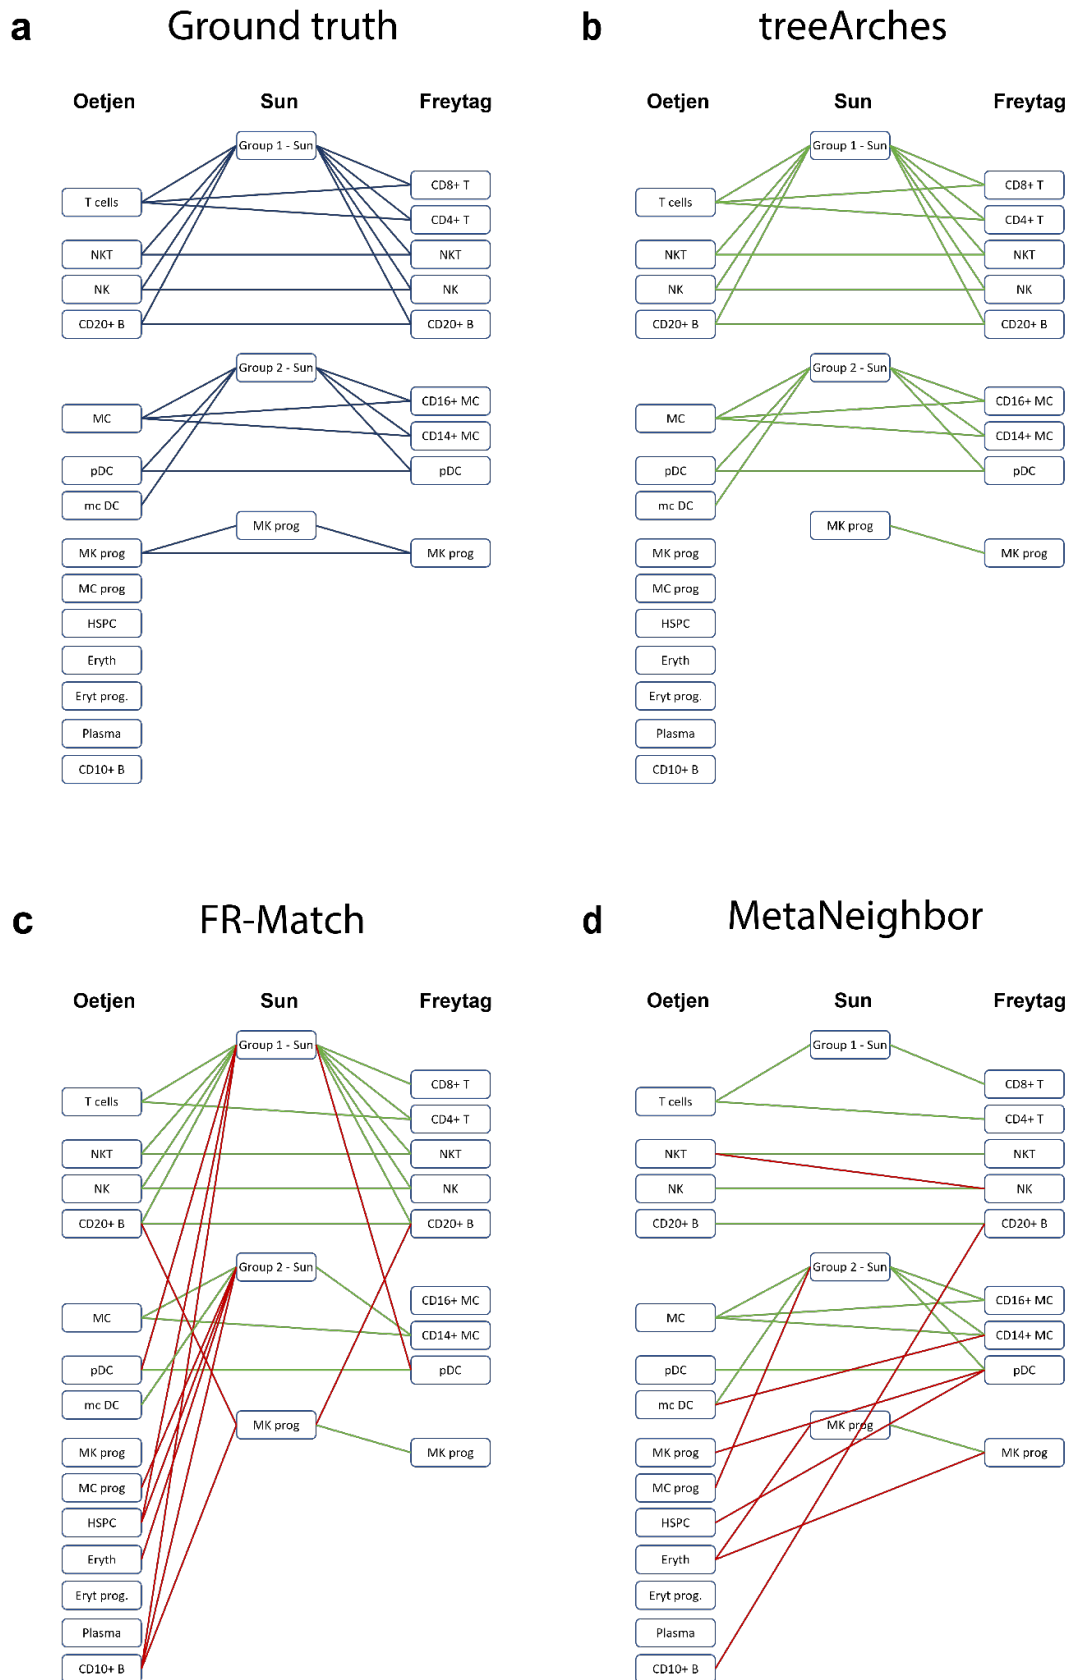

**Figure S5:** Comparison of cell type matching algorithms. a) Graph showing the ground truth matches between cell types. b-d) Results of treeArches, FR-Match, and MetaNeighbor respectively. Edges in green indicate a right edge, and edges in red indicate a wrong edge.

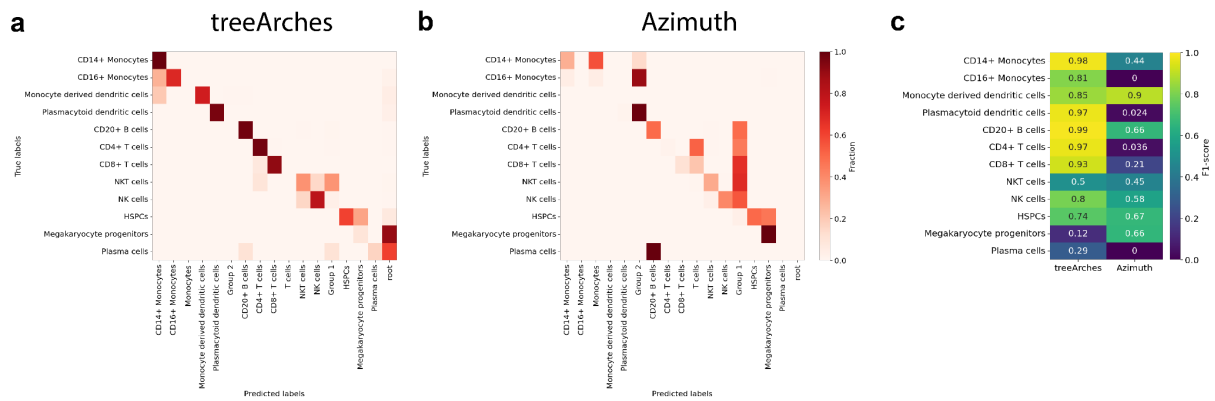

**Figure S6:** Comparison of classification performance using hierarchical labels. a-b) Confusion matrix for treeArches and Azimuth. c) F1 scores per cell type.

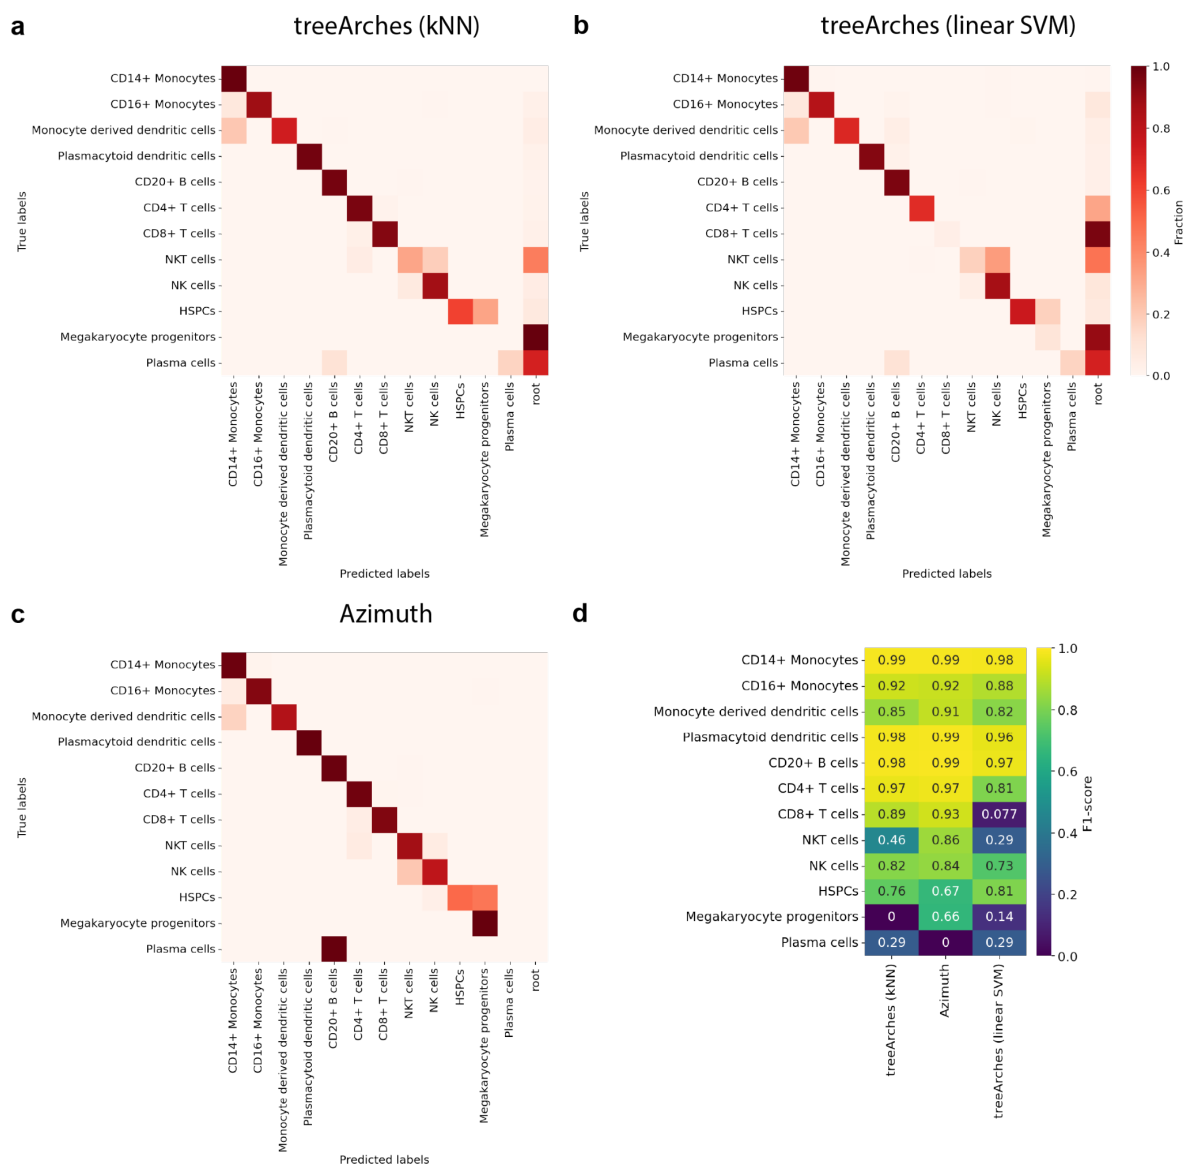

**Figure S7:** Comparison of classification performance using the harmonized labels. a-c) Confusion matrix for treeArches with kNN, treeArches with linear SVM, and Azimuth. d) F1 scores per cell type.

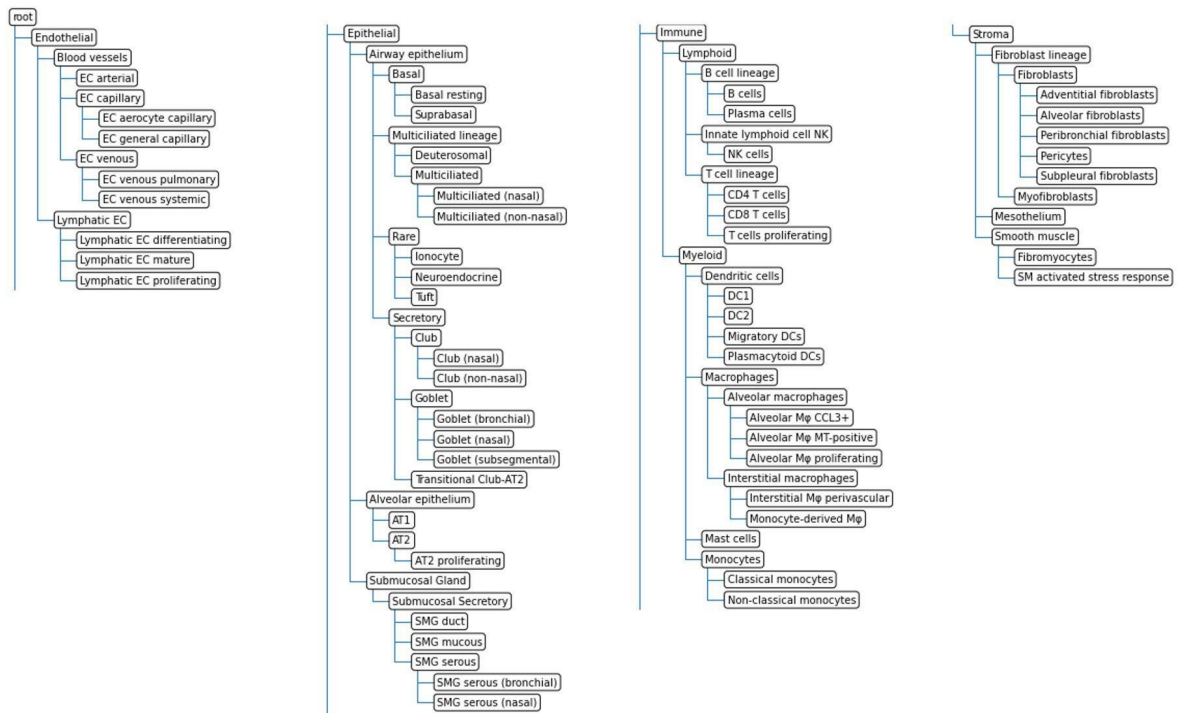

**Figure S8:** cell-type hierarchy constructed for the reference atlas (2).

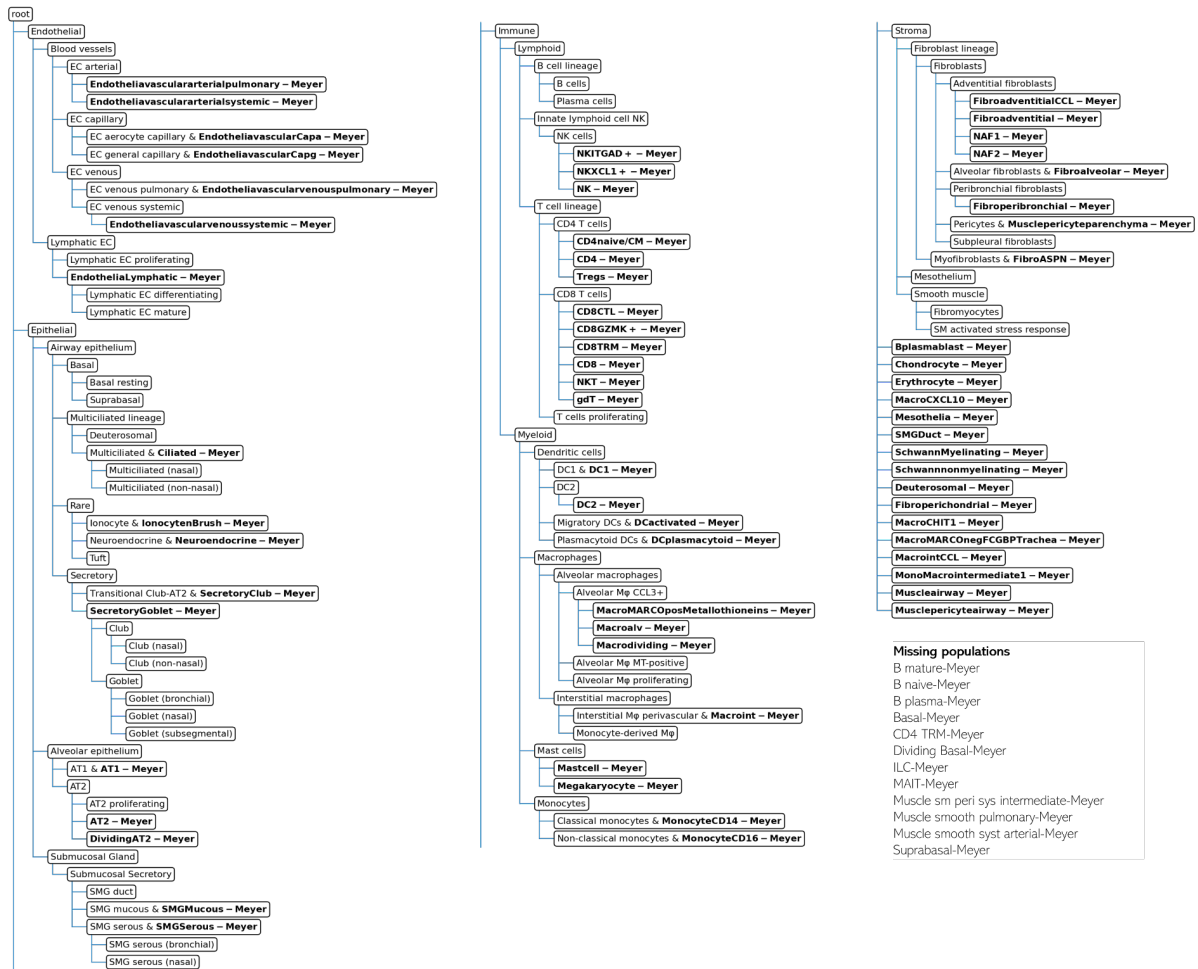

**Figure S9:** Updated cell-type hierarchy learned by adding a query dataset (Meyer dataset) to the reference tree.

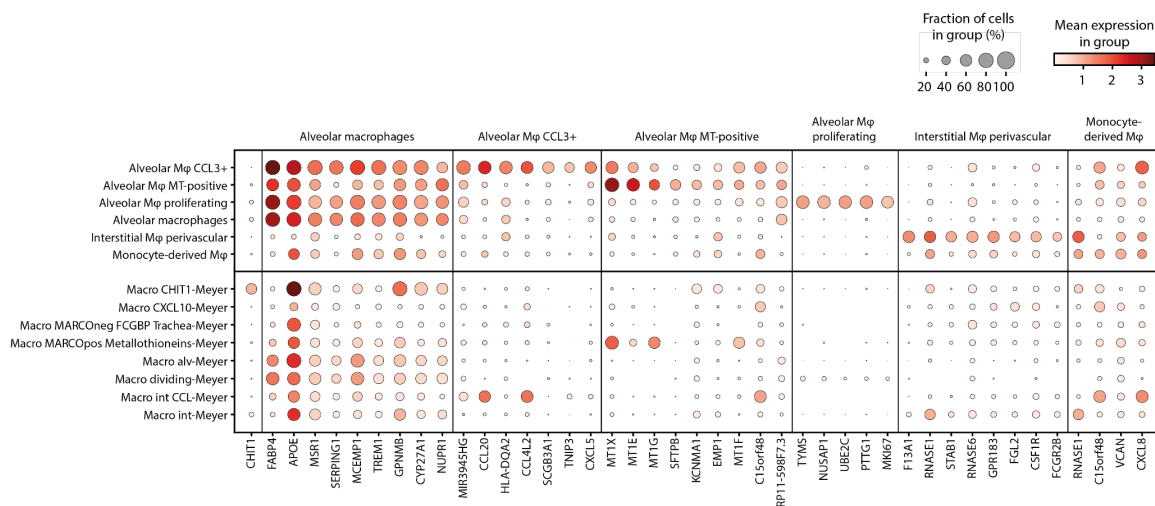

**Figure S10:** Marker gene expression for macrophage cell types in the reference datasets and Meyer dataset. The first column shows the expression of *CHIT1*, a gene used to annotate the Macro CHIT1 cells in the Meyer dataset. The rest of the genes are grouped according to the cell type in the reference atlas they were used as a marker for.

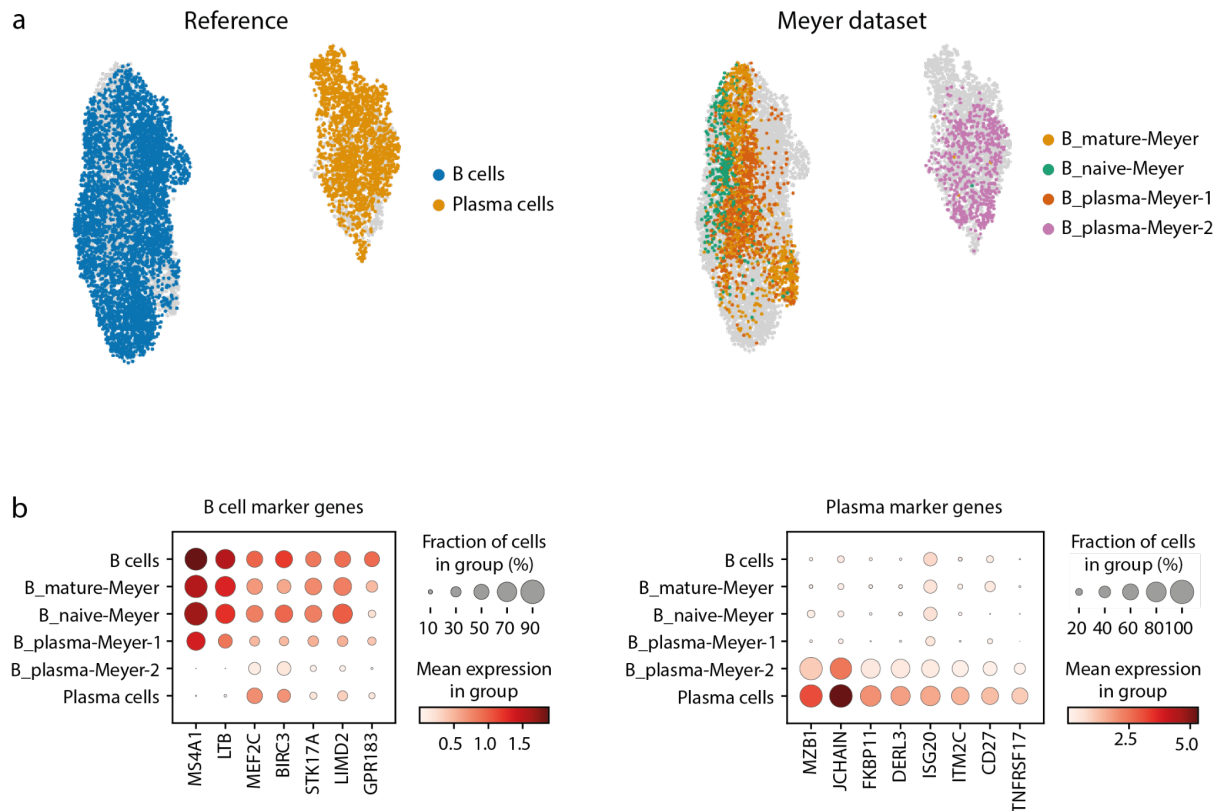

**Figure S11:** a) UMAPs showing the B cells and plasma cells in the reference and Meyer dataset. We split the plasma cells in the Meyer dataset into two groups. The first group overlaps with the reference B cells and the second group overlaps with the reference plasma cells. b) B cell and plasma cell marker gene expression in the reference and Meyer cell types. Plasma-1 from Meyer shows B cell marker gene expression, while Plasma-2 from Meyer shows plasma marker gene expression.



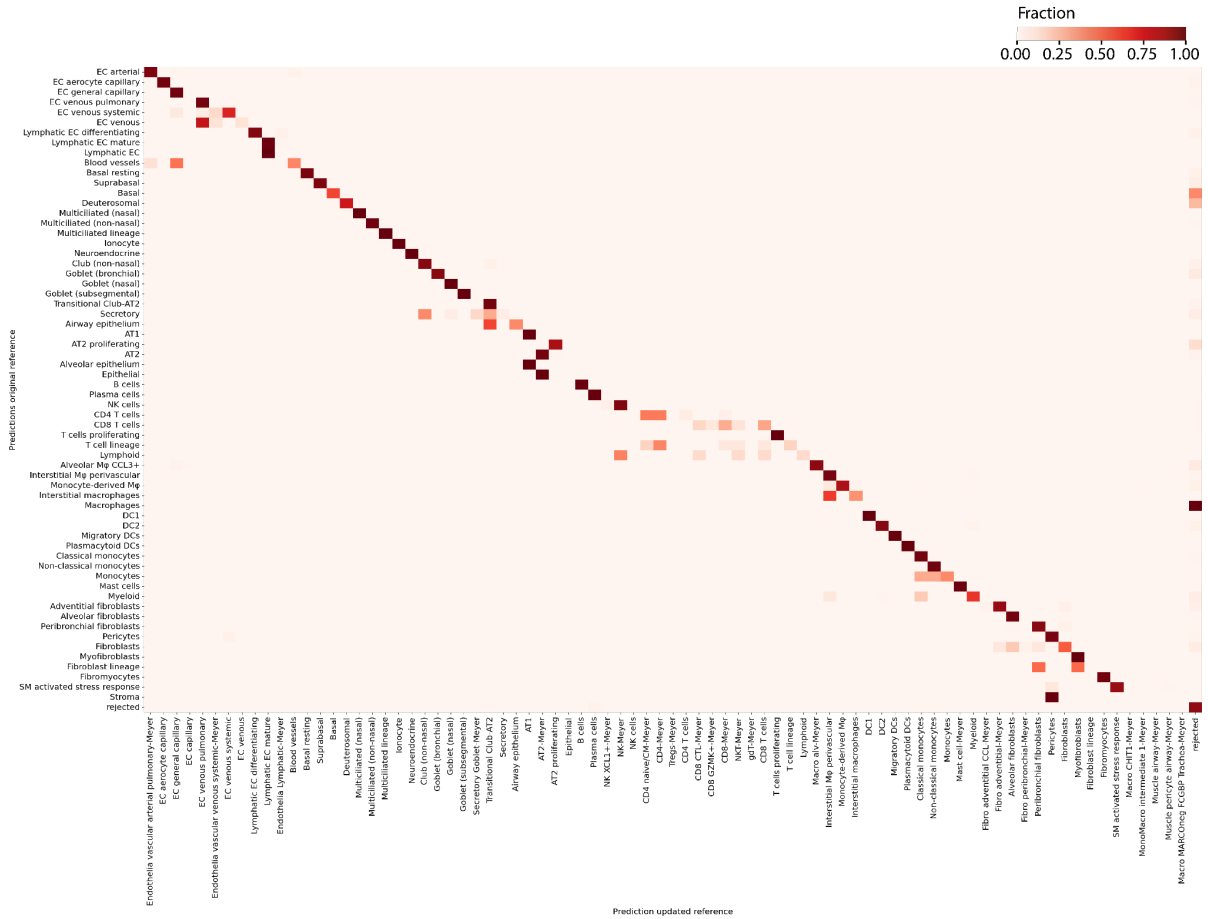

**Figure S12:** Confusion matrix comparing the predictions on the Tata dataset using the original reference and the updated reference.

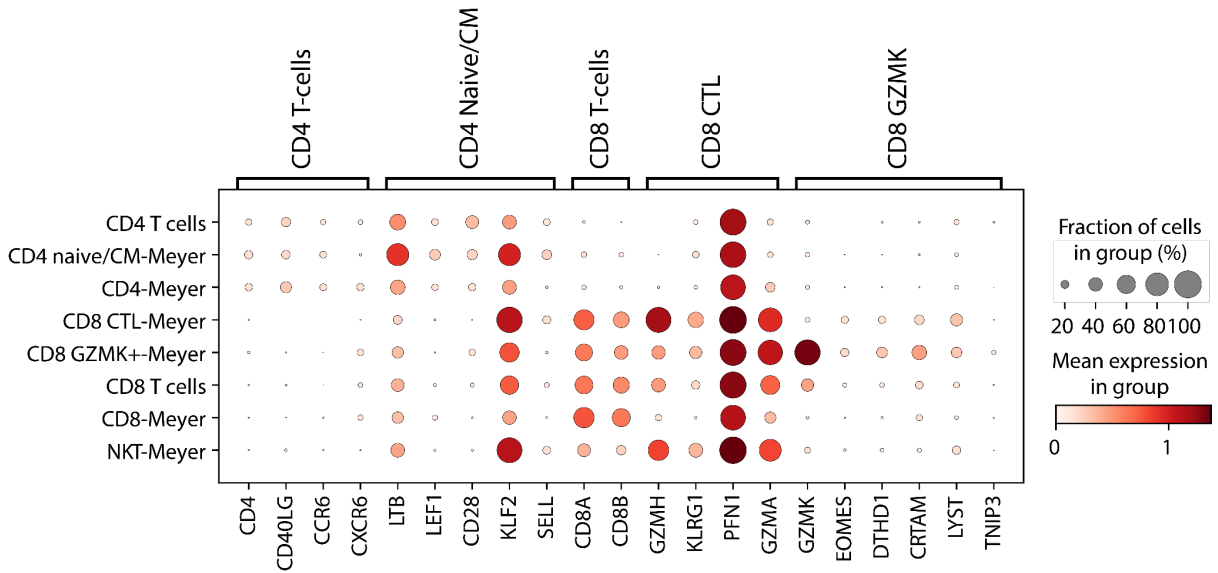

**Figure S13:** Expression of marker genes for CD4+ T cells, CD4+ naive/CM, CD8+ T cells, CD8+ CTL and CD8+ GZMK.

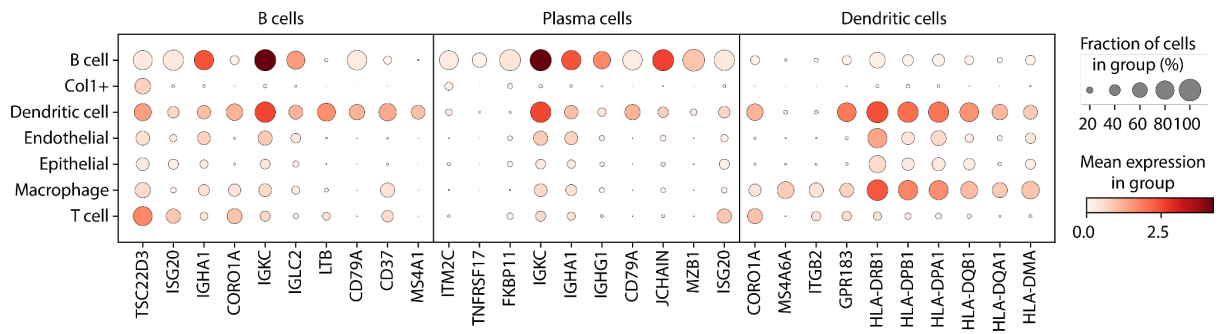

**Figure S14:** Expression of marker genes for B cells, plasma cells, and dendritic cells in the cell types in the IPF dataset.

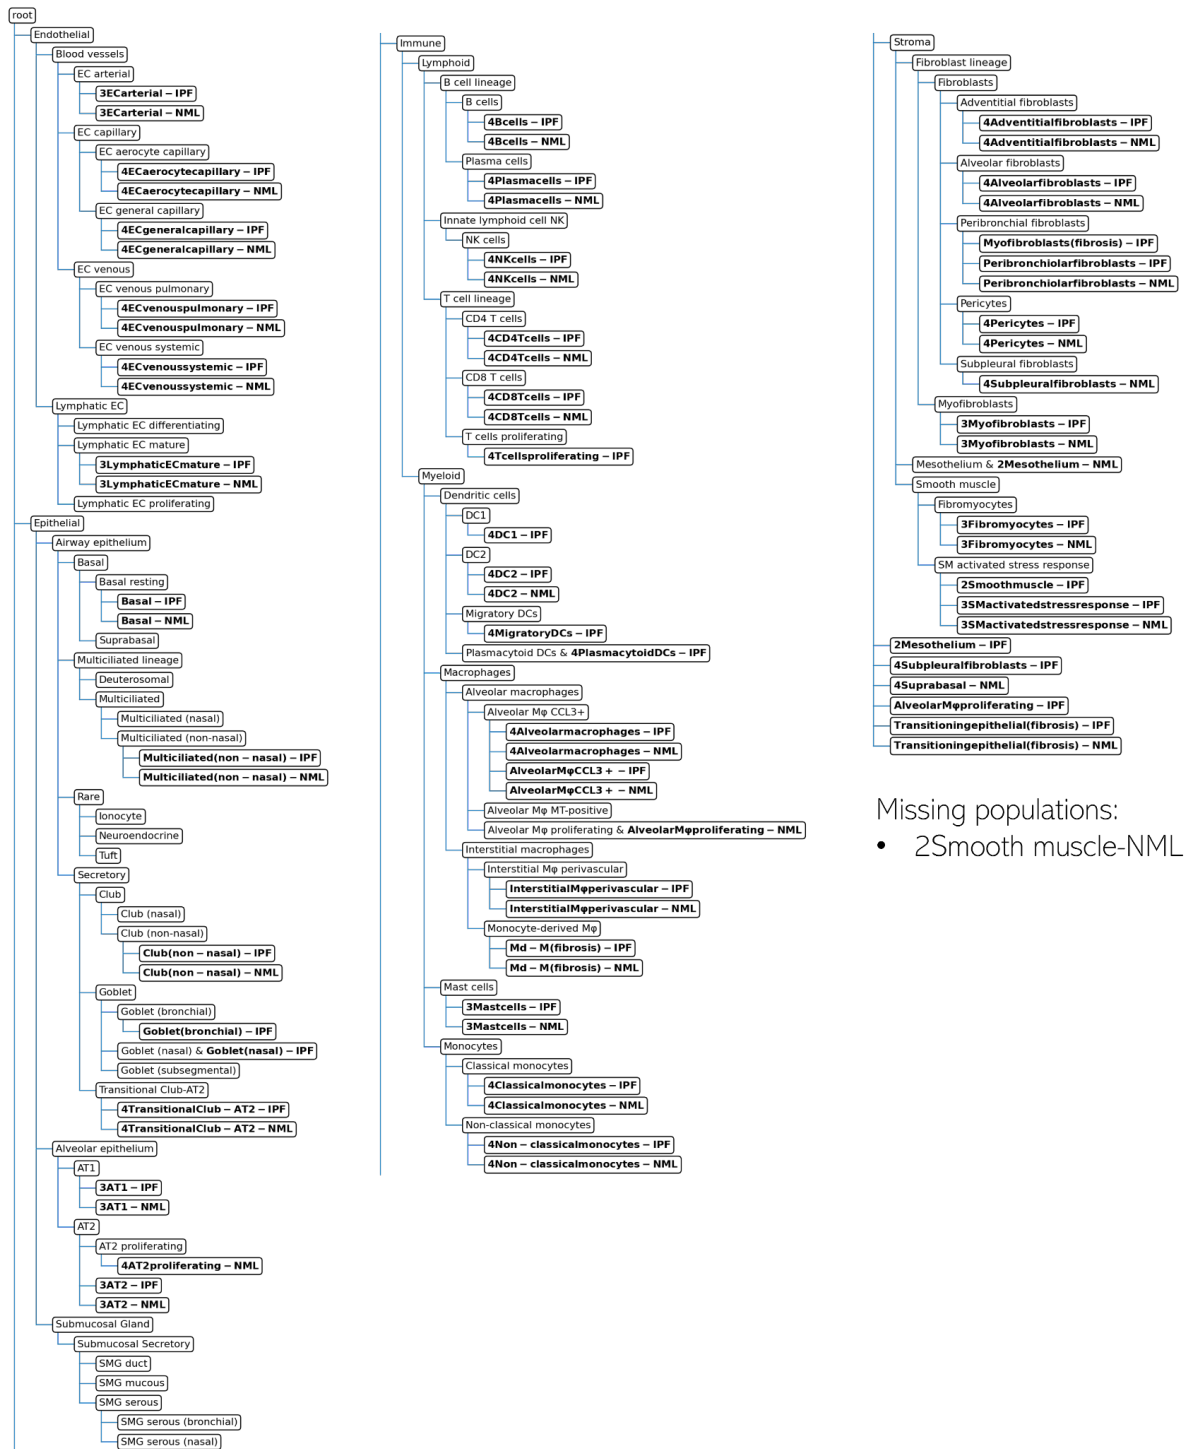

**Figure S15:** Updated hierarchy of the HLCA after adding the IPF dataset (IPF condition and normal condition).

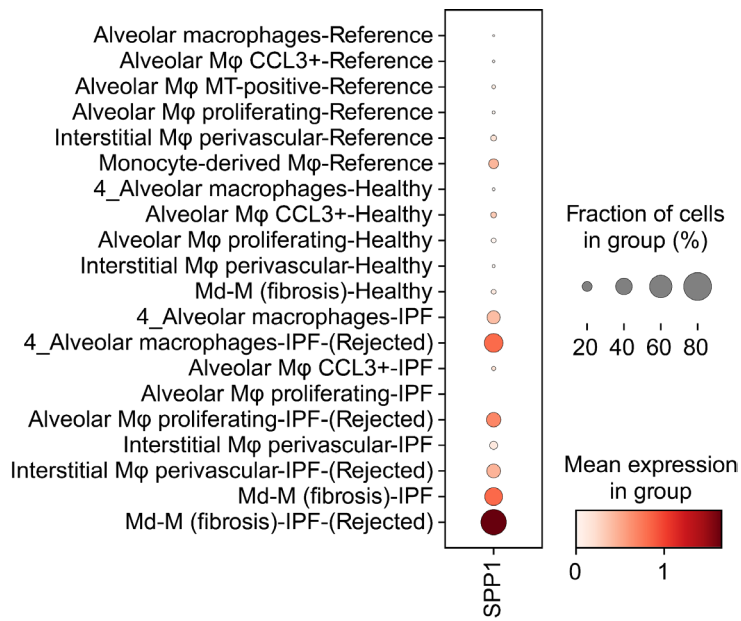

**Figure S16:** Expression of *SPP1* in the different reference and query cell types. The alveolar, interstitial, proliferating, and Md-M (fibrosis) IPF cell types are split into the rejected and non-rejected cells.

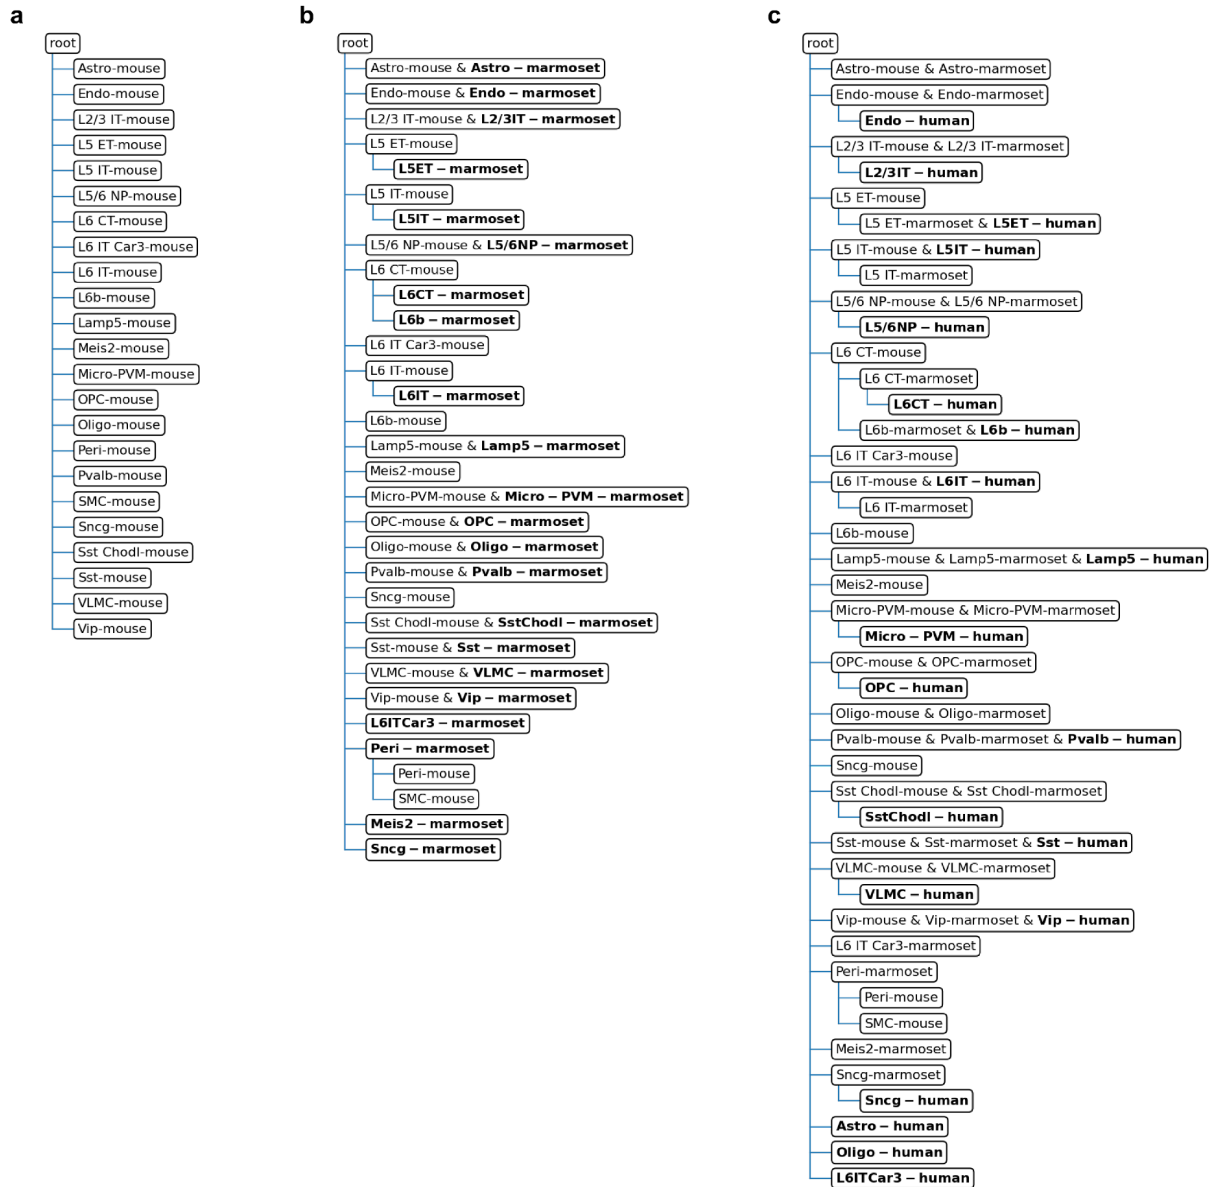

**Figure S17:** The complete hierarchy and intermediate steps when creating the cell-type hierarchy for the motor cortex datasets. a) Starting tree, which is a flat tree containing only the cell types of the mouse dataset, b) marmoset dataset added, c) human added

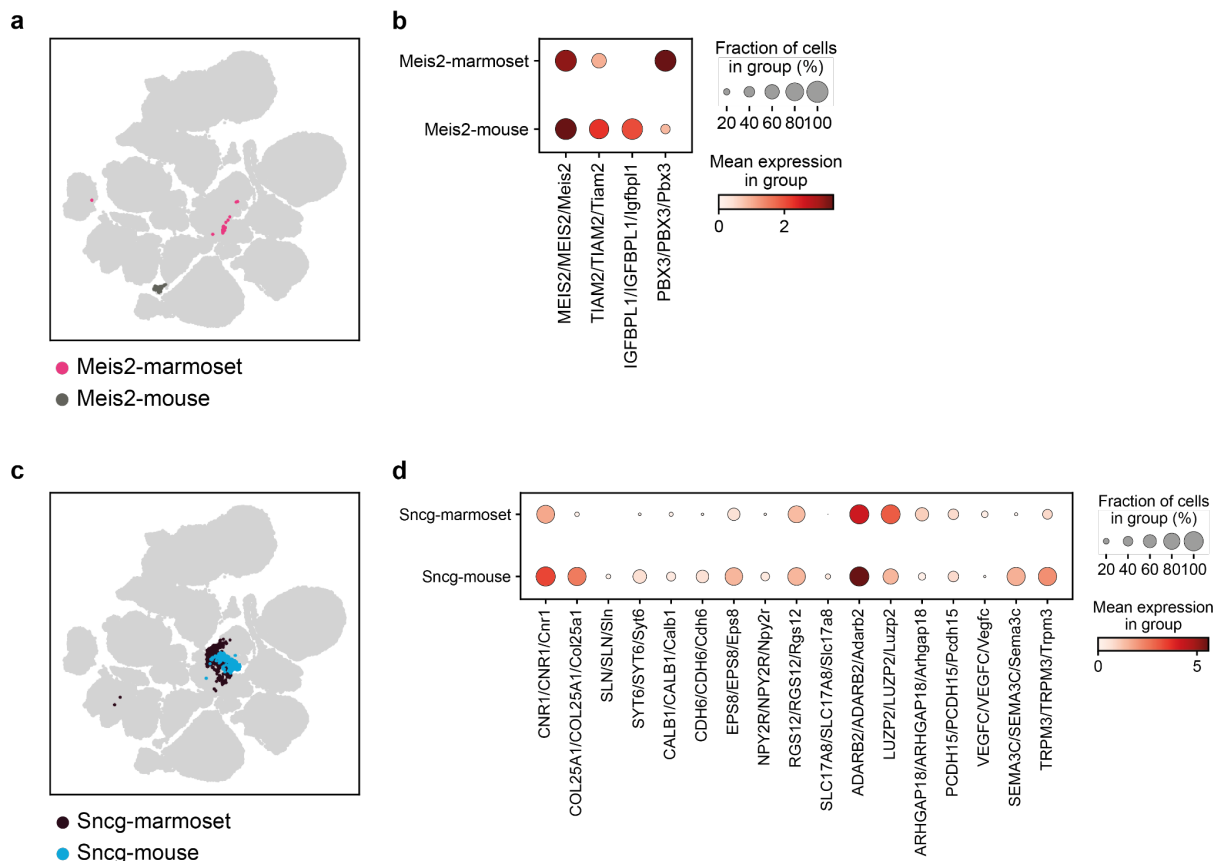

**Figure S18:** a) and c) UMAP embedding showing the integrated latent space of the reference datasets (mouse and human). The Meis2 and Sncg cell types are highlighted respectively. b) and d) Marker gene expression for the Meis2 and Sncg cell types respectively. The three gene names shown are the human/marmoset/mouse gene names.

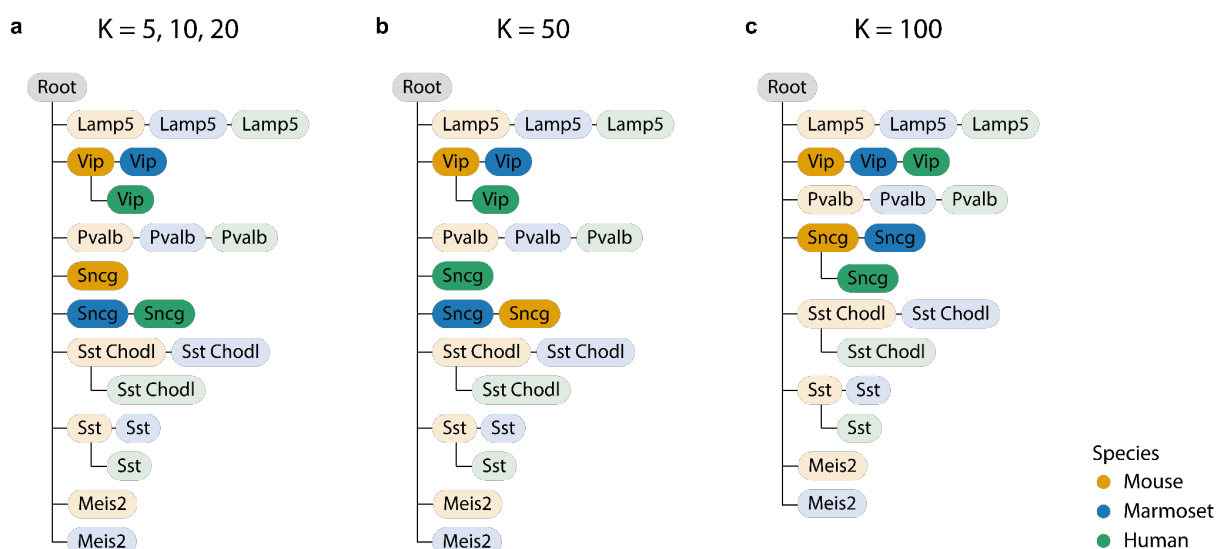

**Figure S19:** Influence of the number of neighbors (K) on the learned hierarchy. The nodes are colored according to the species they come from. The links between most nodes are robust and do not change when the number of neighbors varies. The differences between the trees are highlighted using brighter colors.

**Table S1:** Runtime and memory usage of treeArches on the different datasets. All runtimes are using 1 GPU.

|                             | PBMC    | HLCA (Meyer) | HLCA (IPF) | Cross-species |
|-----------------------------|---------|--------------|------------|---------------|
| Total number of cells       | 32,484  | 713,512      | 646,487    | 305,638       |
|                             |         |              |            |               |
| Integrating reference       | 3 min   | *            | *          | 2 h           |
| Constructing reference tree | 0.5 min | *            | *          | 22 min        |
| Training reference tree     | -       | 7 min        | 7 min      | -             |
| Integrating query           | 0.5 min | *            | *          | 10 min        |
| Updating tree with query    | 0.5 min | 2.5 h        | 1.5 h      | 25 min        |
|                             |         |              |            |               |
| Memory                      | 8.5 GB  | 6.3 GB       | 3.3 GB     | 81.9 GB       |

\* For the HLCA, we used the latent space and hierarchy constructed in their original paper. As a consequence, we don't have to construct the hierarchy but only train the classifiers. This also explains the lower memory usage.

**Table S2:** Information on PBMC datasets used in this study

| Dataset      | Tissue      | No. of Samples | No. of cells | No. of genes | No. of cell types | Protocol | Reference or query |
|--------------|-------------|----------------|--------------|--------------|-------------------|----------|--------------------|
| Oetjen (19)  | Bone marrow | 3              | 9581         | 12303        | 16                | 10X v2   | Reference          |
| Sun (21)     | PBMC        | 4              | 8829         | 12303        | 10                | 10X      | Reference          |
| Freytag (20) | PBMC        | 1              | 3347         | 12303        | 9                 | 10X v2   | Reference          |
| 10X (27)     | PBMC        | 1              | 10727        | 12303        | 12                | 10X v3   | Query              |

**Table S3:** Overview of cell types (original labels) in the PBMC datasets

| cell type       | Oetjen | Sun  | Freytag | 10X  |
|-----------------|--------|------|---------|------|
| CD4+ T          | 2524   | 4312 | 1238    | 2937 |
| CD8+ T          | 985    | 578  | 270     | 350  |
| NKT             | 608    | 649  | 432     | 1056 |
| NK              | 89     | 973  | 476     | 756  |
| CD20+ B         | 491    | 409  | 427     | 1546 |
| CD10+ B         | 207    |      |         |      |
| CD14+ MC        | 997    | 1501 | 452     | 3388 |
| CD16+ MC        | 165    | 271  | 25      | 364  |
| MC derived DC   | 214    | 82   |         | 182  |
| pDC             | 133    | 40   | 11      | 81   |
| MK progenitor   | 219    | 14   | 16      | 21   |
| Erythrocytes    | 1502   |      |         |      |
| Erythroid prog. | 463    |      |         |      |
| HSPC            | 445    |      |         | 28   |
| MC progenitor   | 428    |      |         |      |
| Plasma cell     | 111    |      |         | 18   |



**Table S4:** Cell type labels of the PBMC datasets after relabeling.

| Original label  | Oetjen          | Sun           | Freytag       | 10X           |
|-----------------|-----------------|---------------|---------------|---------------|
| CD4+ T          | T cells         | Group 1 - Sun | CD4+ T        | CD4+ T        |
| CD8+ T          | T cells         | Group 1 - Sun | CD8+ T        | CD8+ T        |
| NKT             | NKT             | Group 1 - Sun | NKT           | NKT           |
| NK              | NK              | Group 1 - Sun | NK            | NK            |
| CD20+ B         | CD20+ B         | Group 1 - Sun | CD20+ B       | CD20+ B       |
| CD10+ B         | CD10+ B         |               |               |               |
| CD14+ MC        | MC              | Group 2 - Sun | CD14+ MC      | CD14+ MC      |
| CD16+ MC        | MC              | Group 2 - Sun | CD16+ MC      | CD16+ MC      |
| MC derived DC   | MC derived DC   | Group 2 - Sun |               | MC derived DC |
| pDC             | pDC             | Group 2 - Sun | pDC           | pDC           |
| MK progenitor   | MK progenitor   | MK progenitor | MK progenitor | MK progenitor |
| Erythrocytes    | Erythrocytes    |               |               |               |
| Erythroid prog. | Erythroid prog. |               |               |               |
| HSPC            | HSPC            |               |               | HSPC          |
| MC progenitor   | MC progenitor   |               |               |               |
| Plasma cell     | Plasma cell     |               |               | Plasma cell   |

**Table S5:** Differentially expressed genes between the rejected and not-rejected cells

|                        | Genes higher expressed in not-rejected cells | Genes higher expressed in rejected cells                                                                                                                                                                                                                                                                                                                                                                                                                                                                                                                                                                                         |
|------------------------|----------------------------------------------|----------------------------------------------------------------------------------------------------------------------------------------------------------------------------------------------------------------------------------------------------------------------------------------------------------------------------------------------------------------------------------------------------------------------------------------------------------------------------------------------------------------------------------------------------------------------------------------------------------------------------------|
| NKT-cells (Oetjen)     | <i>CD8A, CD8B</i>                            | <i>RGS1, ITM2A</i>                                                                                                                                                                                                                                                                                                                                                                                                                                                                                                                                                                                                               |
| NKT-cells (Freytag)    | <i>GLNY</i>                                  | -                                                                                                                                                                                                                                                                                                                                                                                                                                                                                                                                                                                                                                |
| CD8+ T-cells (Freytag) | -                                            | -                                                                                                                                                                                                                                                                                                                                                                                                                                                                                                                                                                                                                                |
| MC-derived DC          | <i>ETV3</i>                                  | <i>CKS1B, MKI67, RNASE2, TMPO, TK1, TYMS, ZWINT, DTYMK, UBE2C, CDKN3, BIRC5, HMGB3, CENPF, SMC2, CDC20, NUSAP1, TOP2A, CENPW, RNASEH2A, HIST1H4C, PTTG1, RRM2, SMC4, TROAP, PHF19, GGH, H2AFX, MCM7, NCAPD3, NCAPD2, MAD2L1, LIG1, CEP55, VRK1, GMNN, NUF2, CENPM, EZH2, PRC1, CDT1, RAD51AP1, ASF1B, TPX2, UBE2T, AURKB, SHCBP1, WDR34, FEN1, NCAPG2, CLSPN, PLK1, RPL39L, KIF11, KIFC1, CDCA7L, CENPK, NT5DC2, HIRIP3, LMNB2, CDK1, HMMR, PXMP2, BRCA2, SLC2A4RG, ACOT7, ASRGL1, CCNB2, GTSE1, CCNB1, ACAT2, TCF19, PHGDH, MND1, FOXM1, FANCI, CCNA2, RFC5, CDC25B, CENPE, ATAD3A, ATAD5, MYBL2, CDK5RAP2, CTNNAL1, GTF3C5</i> |

**Table S6:** Quantitative evaluation of the cell type matching algorithms.

| Method       | Correct edges | Missing edges | Wrong edges |
|--------------|---------------|---------------|-------------|
| treeArches   | 24            | 2             | 0           |
| FR-Match     | 19            | 7             | 11          |
| MetaNeighbor | 15            | 11            | 8           |

**Table S7:** Information on brain datasets used in this study

| Species  | No. of cells | No. of genes | No. of cell types<br>(class/subclass/<br>RNA_cluster) | Protocol |
|----------|--------------|--------------|-------------------------------------------------------|----------|
| Mouse    | 159,739      | 27,439       | 3/23/116                                              | 10X v3   |
| Marmoset | 69,279       | 27,466       | 3/22/94                                               | 10X v3   |
| Human    | 76,621       | 32,991       | 3/20/127                                              | 10X v3   |
